# Supplementary material for: Efficient Degradation of Congo Red in Water by UV-Vis Driven CoMoO4/PDS Photo-Fenton System
Source: MDPI journal article supplement (doi:10.3390/molecules27248642), 2022-12-07
Supplement: s1 [file s1]

# Supporting Information

## Efficient Degradation of Congo Red in Water by UV-vis Driven CoMoO<sub>4</sub>/PDS Photo-Fenton System

Huimin Zhou <sup>1</sup>, Yang Qiu <sup>1</sup>, Chuanxi Yang <sup>2,\*</sup>, Jinqiu Zang <sup>2</sup>, Zihan Song <sup>2</sup>, Tingzheng Yang <sup>2</sup>, Jinzhi Li<sup>3</sup>, Yuqi Fan <sup>1</sup>, Feng Dang<sup>4</sup> and Weiliang Wang <sup>2,\*</sup>

<sup>1</sup> Institute of Environment and Ecology, Shandong Normal University, Jinan 250358, China

<sup>2</sup> School of Environmental and Municipal Engineering, Qingdao University of Technology, Qingdao 266525, China

<sup>3</sup> Middle School of Gantian, Chenzhou 424400, China; 17674130624@139.com

<sup>4</sup> Key Laboratory for Liquid-Solid Structural Evolution and Processing of Materials, Shandong University, Jinan 250061, China

\* Correspondence: yangchuanxi1989@hotmail.com (C.Y.); sdqcsdnu@163.com (W.W.); Tel.: +86-0532-85071262

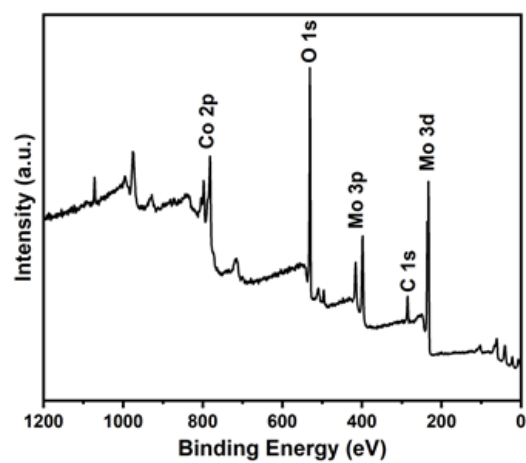

**Figure S1.** XPS spectra of survey.

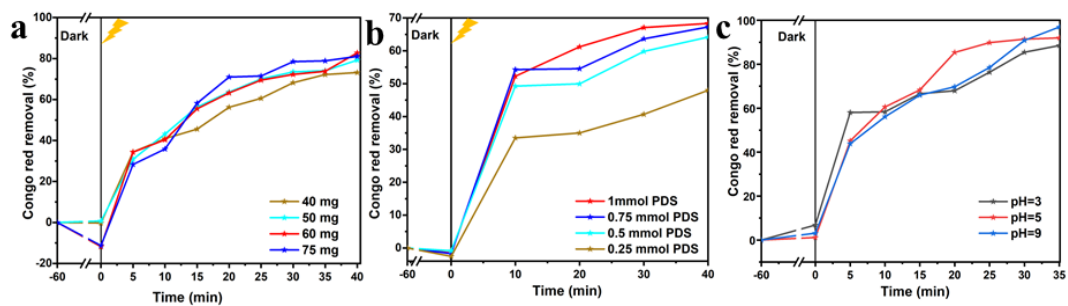

**Figure S2.** (a)Effect of reused CMO-8 loading; (b) Effect of PMS concentration; (c) Effect of pH

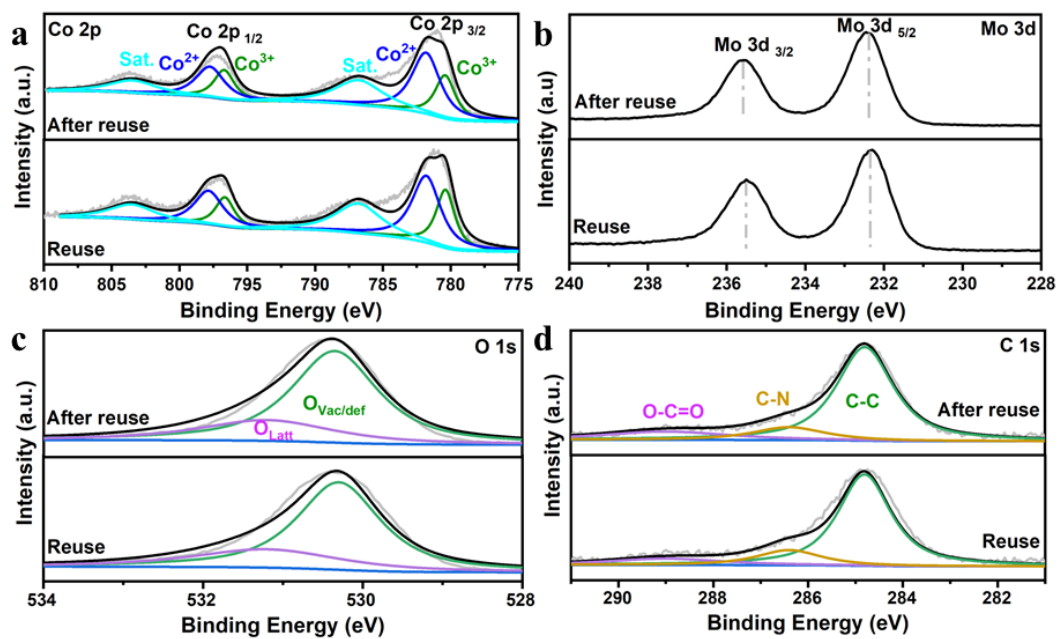

**Figure S3.** XPS spectra of (a) Co 2p; (b) Mo 3d; (c) O 1s; (d) C 1s of CMO-8 reuse and CMO-8 after reuse.

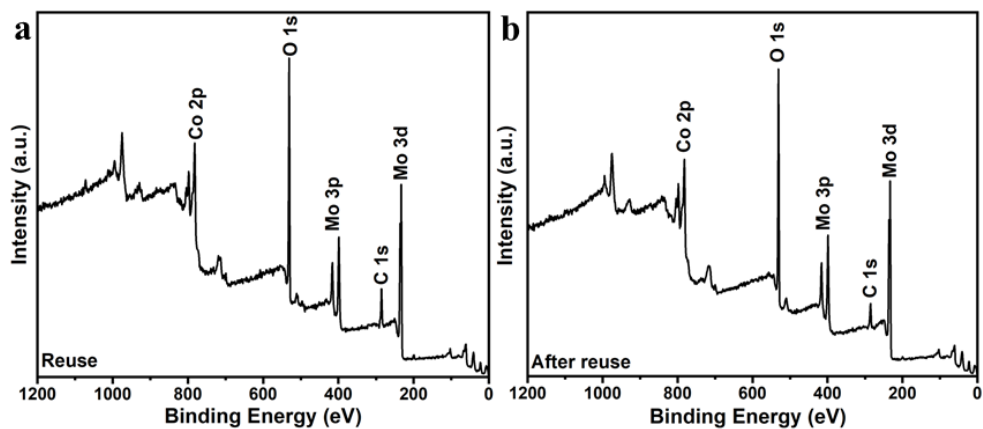

**Figure S4.** XPS spectra of survey of CMO-8 reuse and CMO-8 after reuse.
